# Supplementary material for: Gradient doping of phosphorus in Fe2O3 nanoarray photoanodes for enhanced charge separation
Source: PubMed Central journal article supplement (PMC5304616; doi:10.1039/c6sc03707k), 2016-10-03
Supplement: SC-008-C6SC03707K-s001.pdf [file SC-008-C6SC03707K-s001.pdf]

## **Supporting Information**

# Gradient Doping of Phosphorus in Fe<sub>2</sub>O<sub>3</sub> Nanoarray Photoanodes for Enhanced Charge Separation

Zhibin Luo, Chengcheng Li, Shanshan Liu, Tuo Wang\* and Jinlong Gong\*

*Key Laboratory for Green Chemical Technology of Ministry of Education, School of Chemical Engineering and Technology, Tianjin University; Collaborative Innovation Center of Chemical Science and Engineering, Tianjin 300350, China*

\*Author to whom correspondence should be addressed: [jlgong@tju.edu.cn](mailto:jlgong@tju.edu.cn); [wangtuo@tju.edu.cn](mailto:wangtuo@tju.edu.cn)

**Fig. S1.** HRTEM images of bare  $\text{Fe}_2\text{O}_3$  (a) annealed at 500 °C for 2 hours, and (b) with further annealed at 750 °C for 10 minutes.

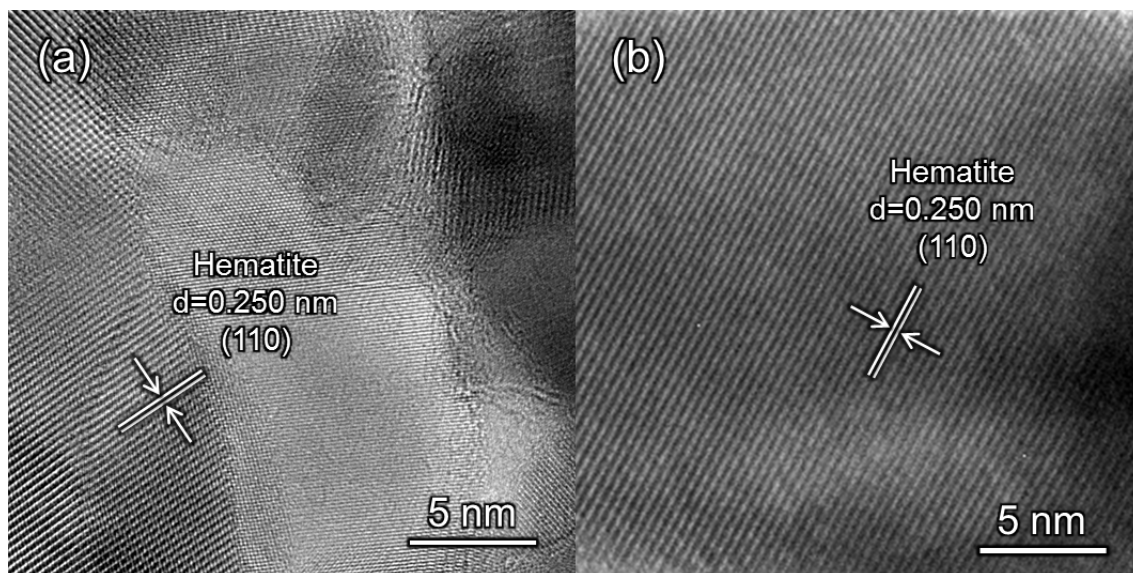

**Fig. S2.** Digital pictures of (a) bare  $\text{Fe}_2\text{O}_3$ , (b) grad-P: $\text{Fe}_2\text{O}_3$  and (c) grad-P: $\text{Fe}_2\text{O}_3$ /Co-Pi photoanodes.

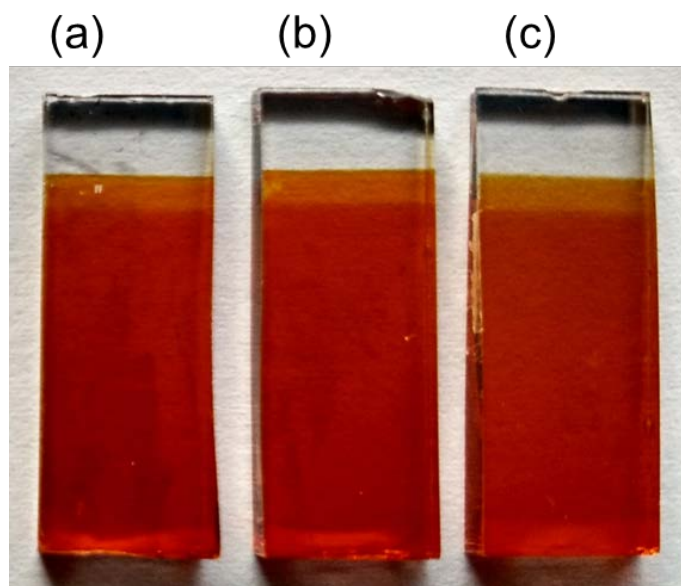

**Fig. S3.** (a) XRD and (b) UV-vis spectra of bare  $\text{Fe}_2\text{O}_3$ , grad-P: $\text{Fe}_2\text{O}_3$  and grad-P: $\text{Fe}_2\text{O}_3/\text{Co-Pi}$  nanobundle array thin films.

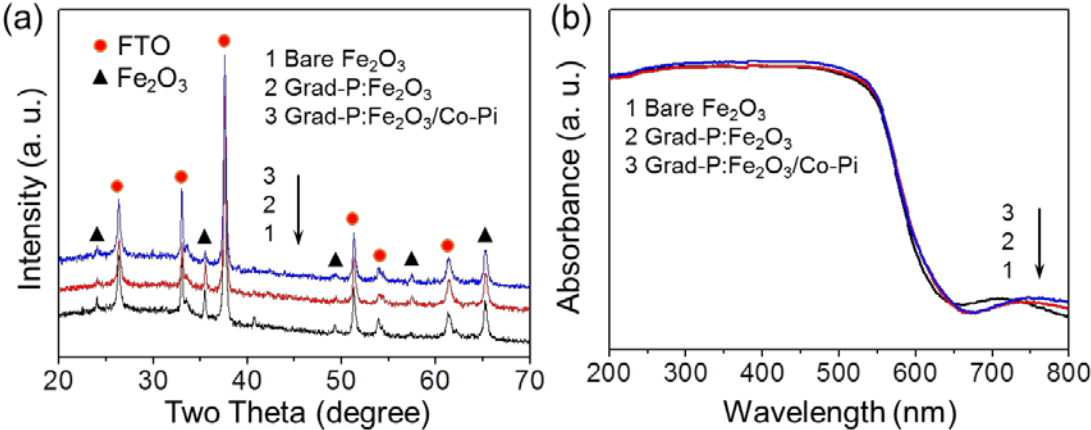

**Fig. S4.** TEM images of (a) bare  $\text{Fe}_2\text{O}_3$  and (b) grad-P: $\text{Fe}_2\text{O}_3$  photoanodes annealed at 750 °C for 10 minutes.

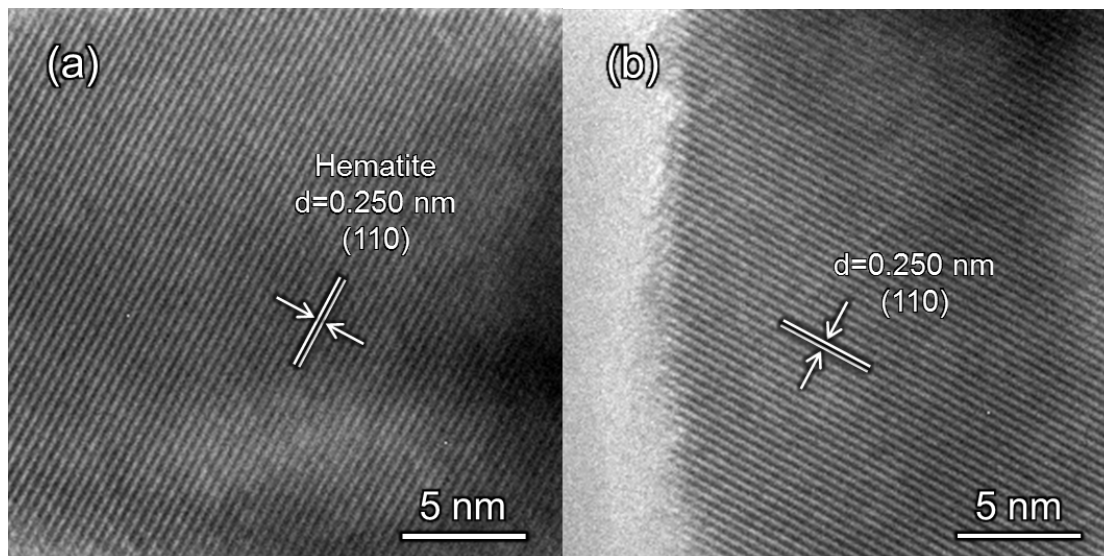

**Fig. S5.** Raman spectra of bare Fe<sub>2</sub>O<sub>3</sub>, homo-P:Fe<sub>2</sub>O<sub>3</sub> and grad-P:Fe<sub>2</sub>O<sub>3</sub> thin films.

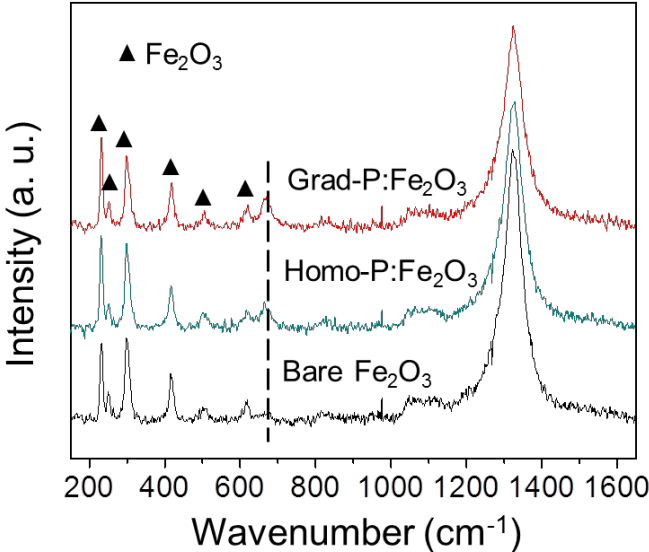

**Fig. S6.** TEM and EDX characterization of a representative grad-P:Fe<sub>2</sub>O<sub>3</sub>. (a), selected grad-P:Fe<sub>2</sub>O<sub>3</sub> nanobundles. (b), (c), (d), element mapping of P, O and Fe, respectively.

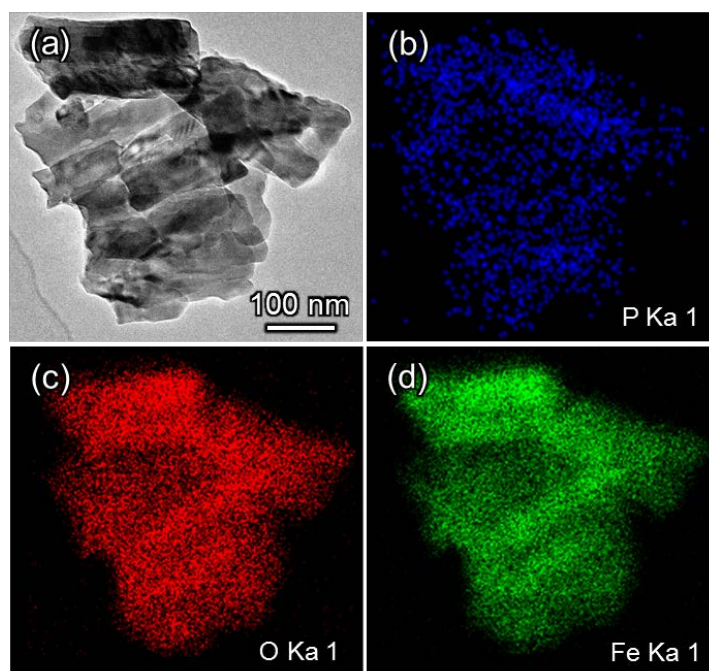

**Fig. S7.** (a) The P content in homo-P:Fe<sub>2</sub>O<sub>3</sub> nanobundle confirmed by EDX analysis. (The error bar indicates the standard deviation) (b) I-V characteristics of P-incorporated Fe<sub>2</sub>O<sub>3</sub> photoanodes with different P content. (1: 0.9% homo-P:Fe<sub>2</sub>O<sub>3</sub>, 2: 2% homo-P:Fe<sub>2</sub>O<sub>3</sub>, 3: 3% homo-P:Fe<sub>2</sub>O<sub>3</sub>)

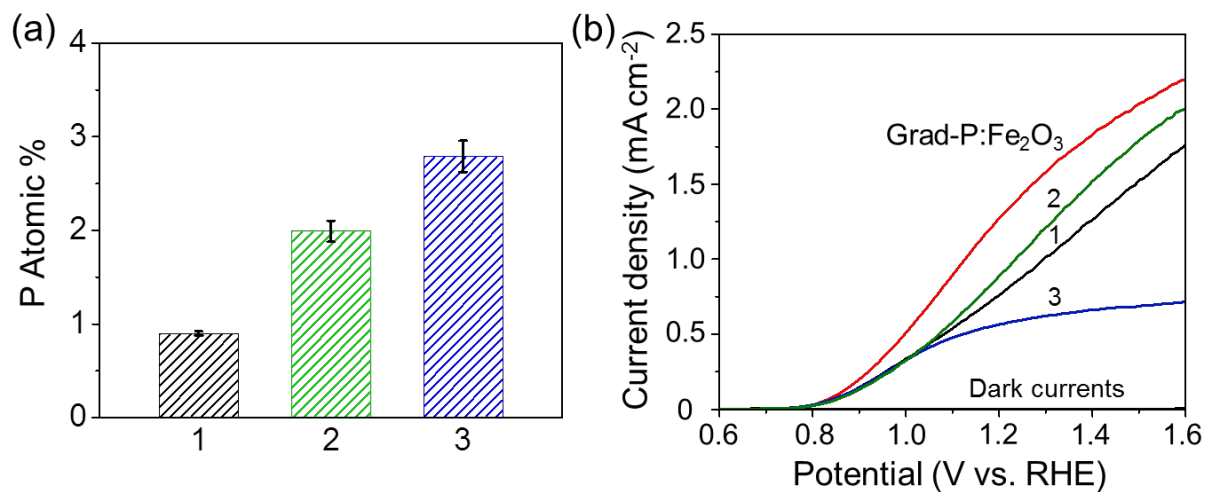



**Fig. S8.** The comparison of photocurrent values of 10 repeated photoanodes at 1.23 V (vs. RHE) under AM 1.5G illumination with standard deviation marked as error bars. (1: bare  $\text{Fe}_2\text{O}_3$ , 2: homo-P: $\text{Fe}_2\text{O}_3$ , 3: grad-P: $\text{Fe}_2\text{O}_3$ , 4: homo-P: $\text{Fe}_2\text{O}_3/\text{Co-Pi}$ , 5: grad-P: $\text{Fe}_2\text{O}_3/\text{Co-Pi}$ )

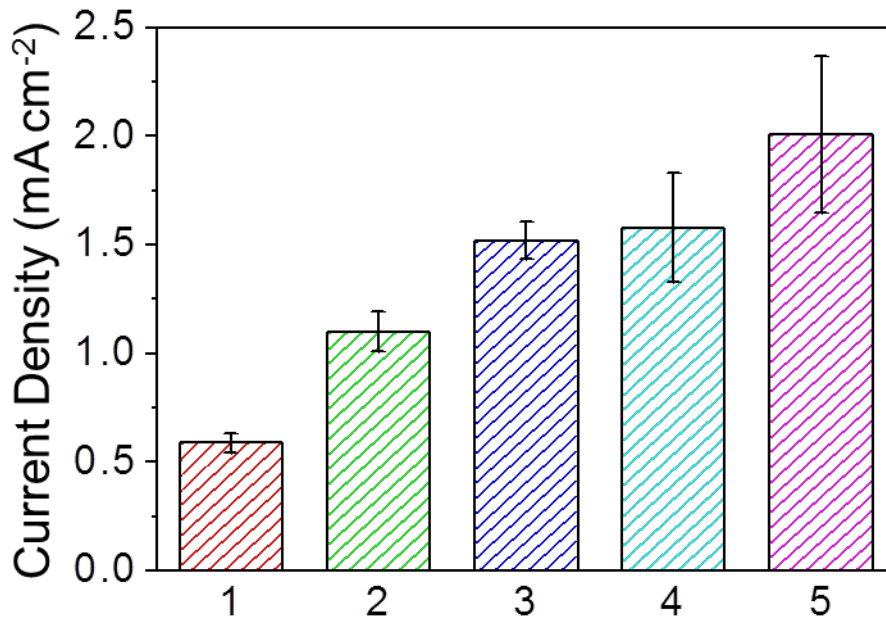

The lower performance of some grad-P: $\text{Fe}_2\text{O}_3/\text{Co-Pi}$  samples compared with homo-P: $\text{Fe}_2\text{O}_3/\text{Co-Pi}$  is likely due to the instability for the Co-Pi cocatalyst.

**Fig. S9.** (a) Schematic illustration of the testing electrode assemblies for the solid-state I-V curves of the electrodes. (b) Solid-state I-V characteristics of the representative electrodes. (1: F:SnO<sub>2</sub>, 2: bare Fe<sub>2</sub>O<sub>3</sub>, 3: grad-P:Fe<sub>2</sub>O<sub>3</sub>, 4: homo-P:Fe<sub>2</sub>O<sub>3</sub>)

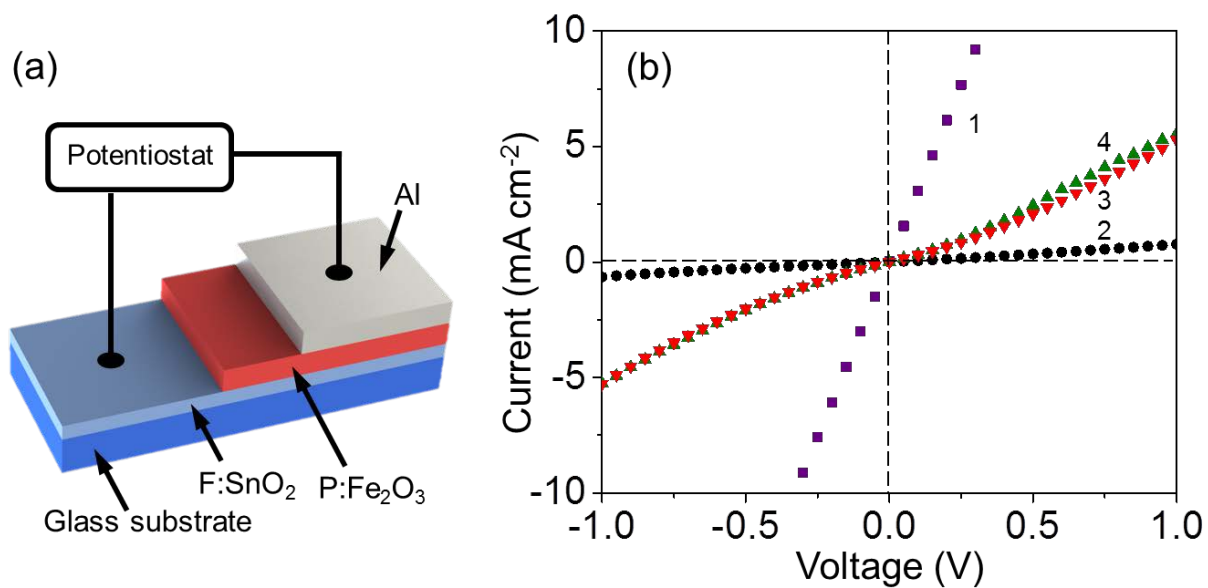

**Table S1.** The resistivity for the conductive FTO layers in various thermal treatment conditions.

| Annealing condition                   | FTO <sup>a)</sup><br>no annealing | 500 °C<br>for 2 h | 750 °C<br>for 10 min | 750 °C<br>for 30 min |
|---------------------------------------|-----------------------------------|-------------------|----------------------|----------------------|
| Resistivity<br>/10 <sup>-4</sup> Ω cm | 6.13 ± 0.33                       | 6.74 ± 0.45       | 8.70 ± 0.71          | 9.25 ± 0.14          |

<sup>a)</sup> The resistivity of FTO measured by vendor (Wuhan Jinge-Solar Energy Technology Co., Ltd) is  $5.60 \times 10^{-4} \Omega \text{ cm}$ .

**Table S2.** Fitting results of the EIS of the bare Fe<sub>2</sub>O<sub>3</sub>, homo-P:Fe<sub>2</sub>O<sub>3</sub> and grad-P:Fe<sub>2</sub>O<sub>3</sub> photoanodes.

| Samples                             | R <sub>s</sub> /Ω | R <sub>ct</sub> /Ω | R <sub>trap</sub> /Ω |
|-------------------------------------|-------------------|--------------------|----------------------|
| Bare Fe <sub>2</sub> O <sub>3</sub> | 45.47 ± 0.59      | 213.1 ± 7.3        | 939.2 ± 35.7         |
| Homo-Fe <sub>2</sub> O <sub>3</sub> | 52.37 ± 0.48      | 111.2 ± 2.2        | 141.3 ± 3.6          |
| Grad-Fe <sub>2</sub> O <sub>3</sub> | 51.05 ± 0.46      | 105.3 ± 2.3        | 135.6 ± 3.7          |

Continued

| Samples                             | C <sub>bulk</sub> /μF | C <sub>trap</sub> /μF | Chi-squared |
|-------------------------------------|-----------------------|-----------------------|-------------|
| Bare Fe <sub>2</sub> O <sub>3</sub> | 0.009 ± 0.0003        | 0.23 ± 0.01           | 0.0306      |
| Homo-Fe <sub>2</sub> O <sub>3</sub> | 0.015 ± 0.0005        | 0.38 ± 0.02           | 0.0124      |
| Grad-Fe <sub>2</sub> O <sub>3</sub> | 0.016 ± 0.0005        | 0.40 ± 0.03           | 0.0137      |
